# Supplementary material
Source: publisher figshare collection journal article supplement (https://karger.figshare.com/ndownloader/files/20219598)
Supplement: Supplementary file 1 [file 20219598]

Study No.: MET-T001

Table S3 Regression Analysis of OS with c-Met Expression and Additional Other Covariates including Edmondson-Steiner - RFA/PEIT Subset

| Covariates                 | Hazard Ratio | 95% CI      |             | p-value |
|----------------------------|--------------|-------------|-------------|---------|
|                            |              | Lower Limit | Upper Limit |         |
| c-Met High                 | 0.289        | 0.139       | 0.599       | <.001   |
| Child-Pugh Class B or C    | 5.641        | 2.727       | 11.671      | <.001   |
| Age (years) ≥65            | 2.817        | 1.621       | 4.895       | <.001   |
| Number of Tumors ≥3 tumors | 2.167        | 1.255       | 3.742       | 0.005   |
| PIVKA-II ≥100 mAU/mL       | 1.923        | 1.063       | 3.478       | 0.030   |
| HBsAg Positive             | 0.487        | 0.207       | 1.146       | 0.099   |
| PT-INR >70                 | 1.622        | 0.863       | 3.047       | 0.133   |
| Sex Male                   | 1.443        | 0.883       | 2.357       | 0.143   |

Subjects with any specimen at the receipt of RFA or PEIT as the first treatment or at the receipt of RFA or PEIT within 92 days (3 months) after TAE or TACE as the first treatment were included.

Hazard ratio and 95% CI are transformed from regression coefficient of Cox regression model.

Covariates are selected with stepwise method from gender, age, HBsAg, HCVAb, alcohol intaken, encephalopathy, ALB, T-Bil, PT-INR, Child-Pugh, tumor size, number of tumors, AFP, PIVKA-II, and Edmondson-Steiner.

Only one sample with cMet higher expression out of the multiple samples collected on the same date is included in the analysis.

CONFIDENTIAL

Output date: 26OCT2018 10:10:57 GMT
